# Supplementary material for: Detailed analysis of HTT repeat elements in human blood using targeted amplification‐free long‐read sequencing
Source: PubMed Central journal article supplement (PMC6175010; doi:10.1002/humu.23580), 2018-07-12
Supplement: HUMU-39-1262-s001.pdf [file HUMU-39-1262-s001.pdf]

Supporting Material and Methods

# **Detailed analysis of *HTT* repeat elements in human blood using targeted amplification-free long-read sequencing**

Ida Höijer, Yu-Chih Tsai, Tyson A. Clark, Paul Kotturi, Niklas Dahl, Eva-Lena Stattin, Marie-Louise Bondeson, Lars Feuk, Ulf Gyllensten and Adam Ameur.

# Supporting Figures

**Figure S1. Target designs.** No-amp targeted sequencing target designs for the *ATXN10*, *FMR1* and *C9orf72* repeat regions.

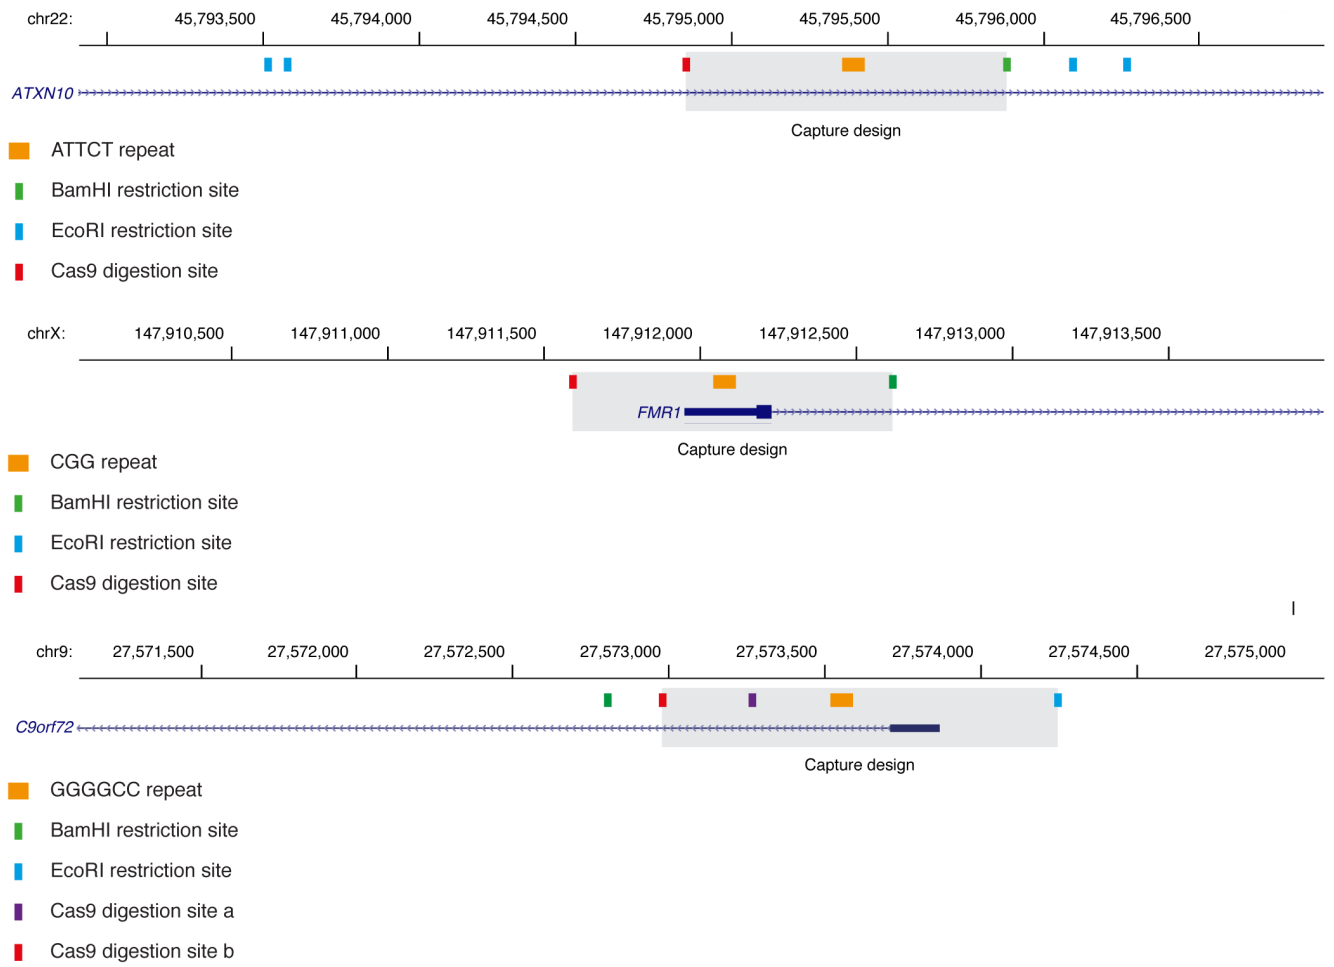

**Figure S2. Coverage plots for replicates.** Genome wide coverage plots for the HEK 293 replicates.

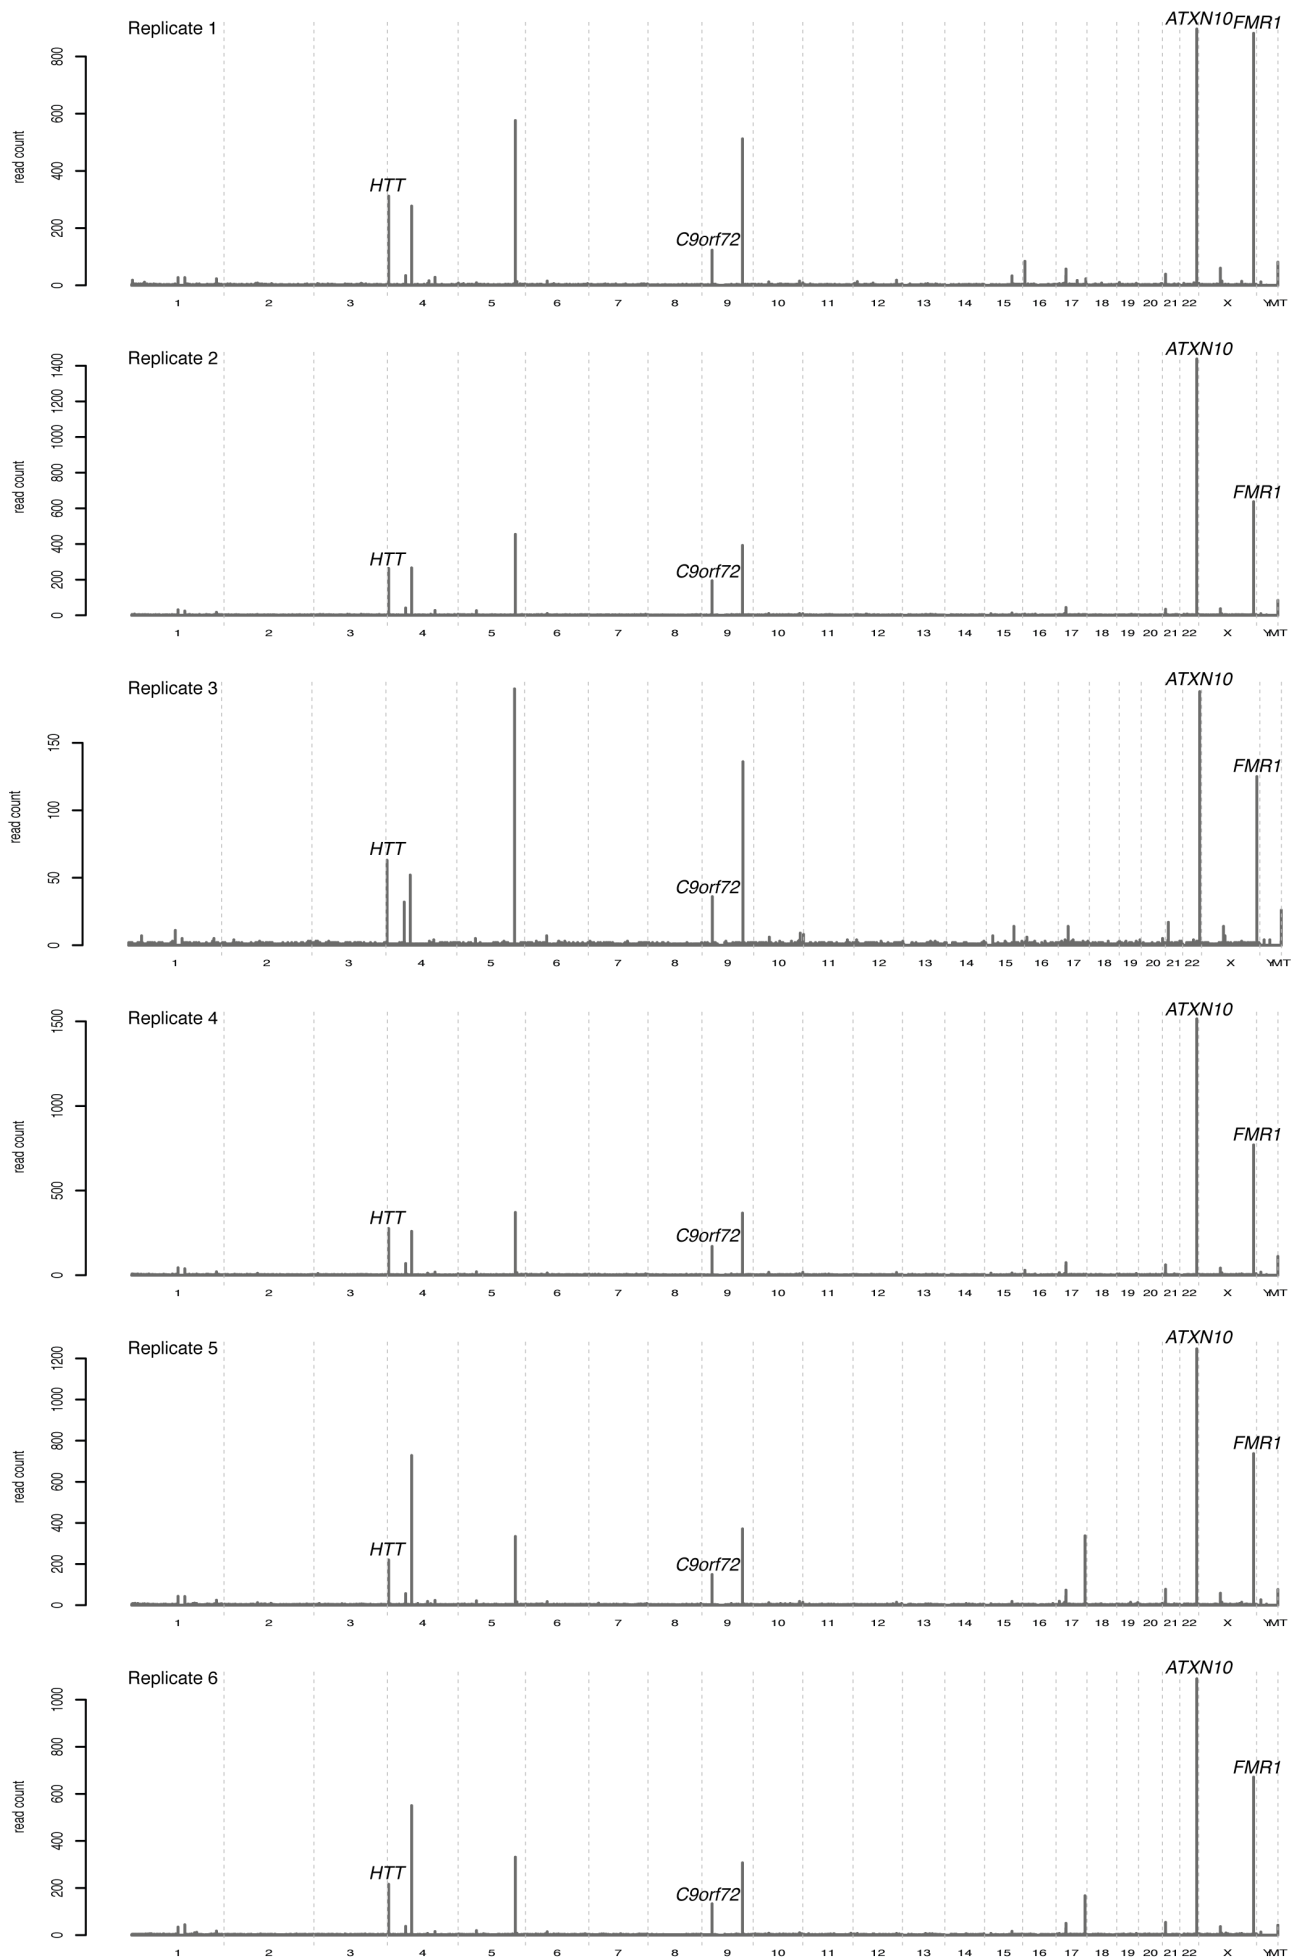

**Figure S3. Off-target effects. Off-target effects caused by gRNA homology to other loci in the genome. A)** Off-target effect caused by homology to the *HTT* gRNA in chromosome 5. **B)** Off-target effect in chromosome 9. Only genomes with SNP rs7861875 show the off-target effect caused by homology to the *ATXN10* gRNA. **C)** Off-target effect in chromosome 4 caused by homology to the *ATXN10* gRNA. Genomic coordinates refer to the GRCh38 reference genome.

A

```
chr5:154,409,392-154,409,411  AGAAGGCCTAAACTCACGGT
                               ||..|||||.|||||||
HTT gRNA                       AGCGGGCCCAAACUCACGGU
```

B

```
                               rs7861875
                               G
chr9:109,570,949-109,570,968  ATACAACATATCAGAATCCC
                               |||||. . . |||||
ATXN10 gRNA                    AUACAAAGGAUCAGAAUCCC
```

C

```
chr4:65,163,126-65,163,145  TCACAAAGGATAAGAATCCC
                               ..|||||||. . |||||
ATXN10 gRNA                    AUACAAAGGAUCAGAAUCCC
```

**Figure S4. Coverage plots for HD samples.** Genome wide coverage plots for the 11 HD samples.

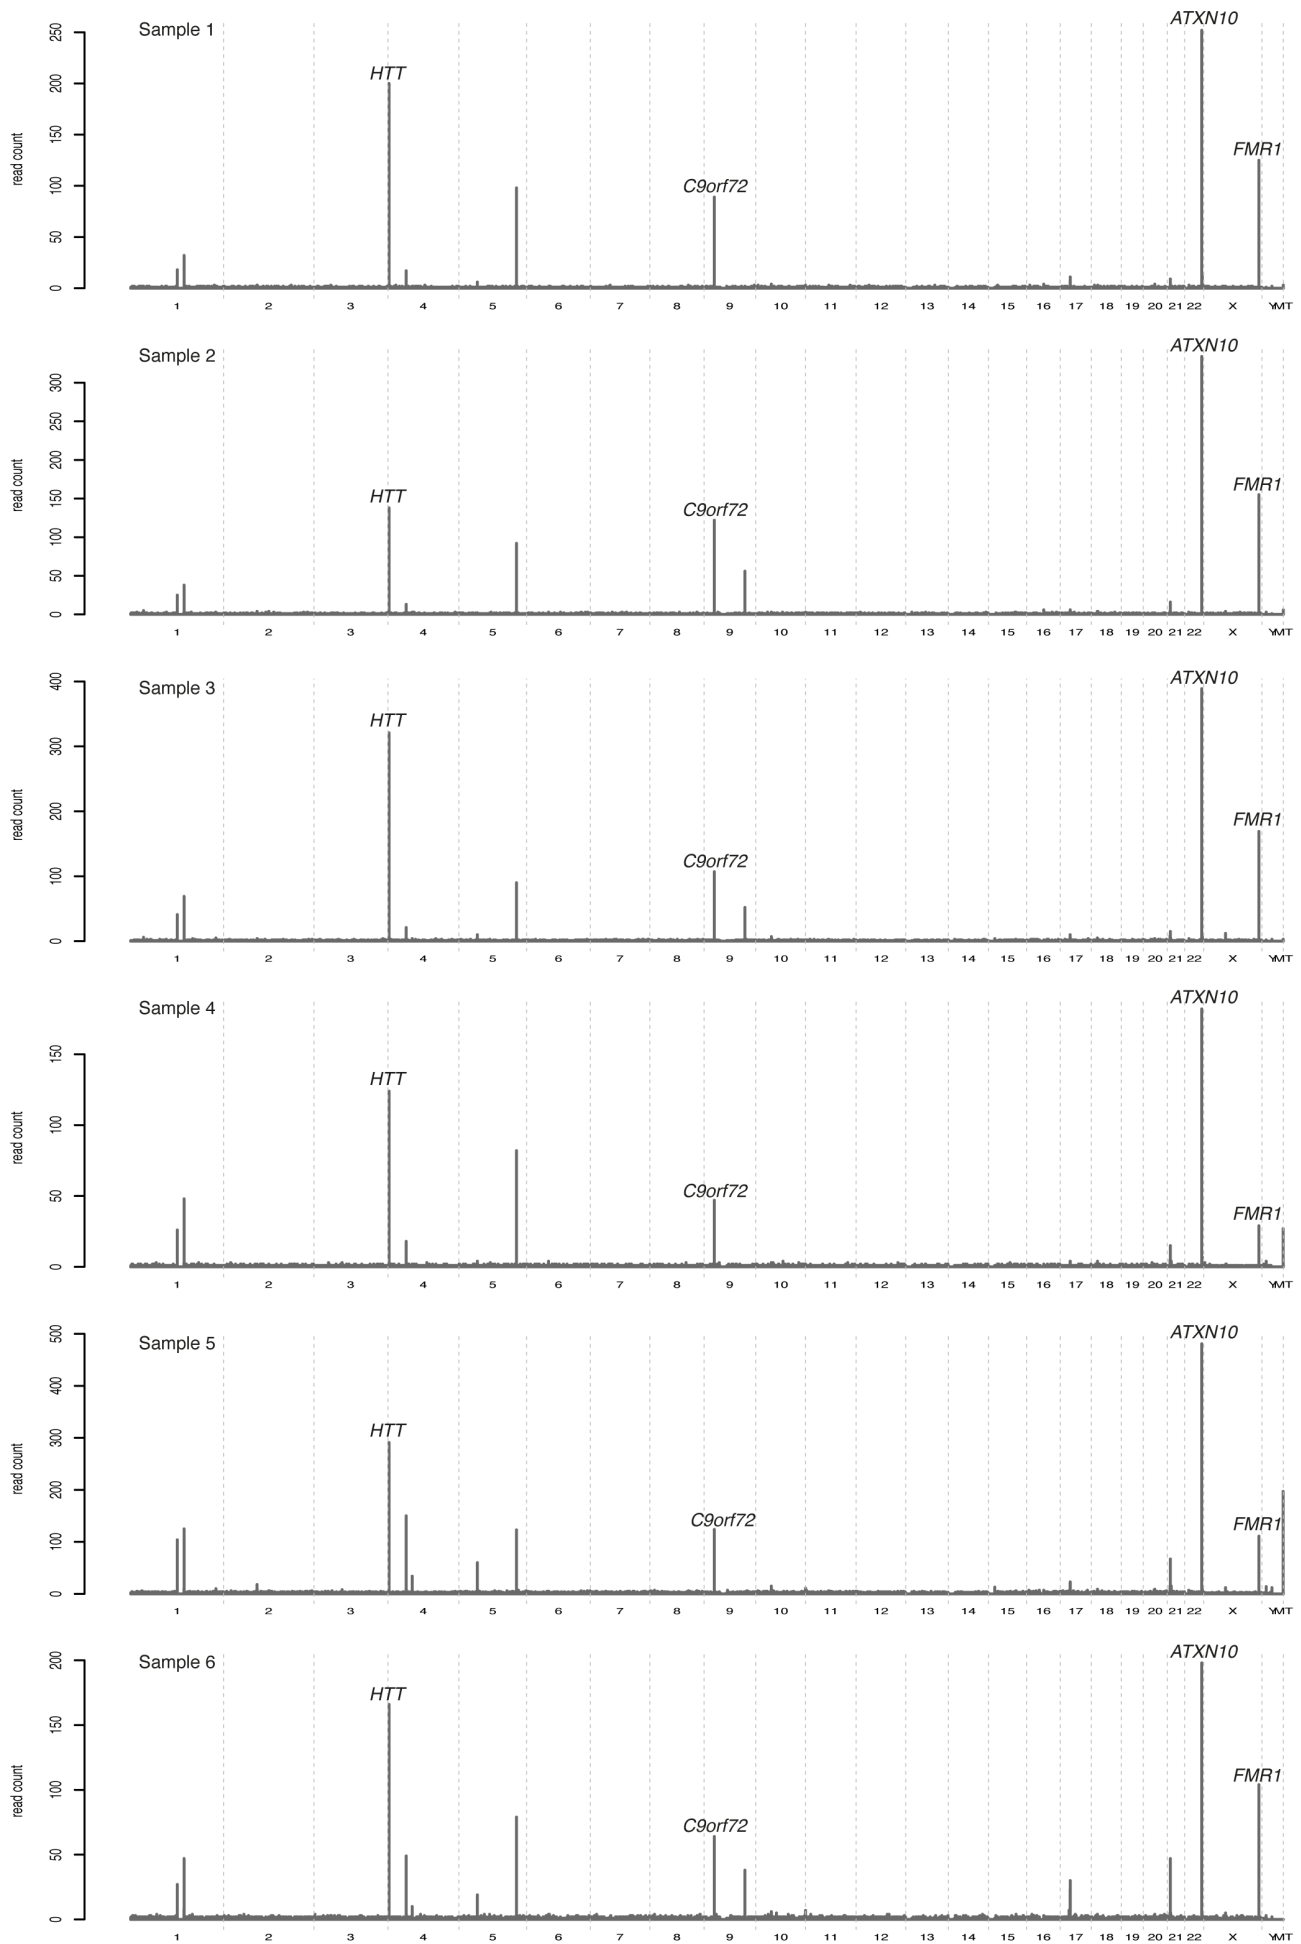

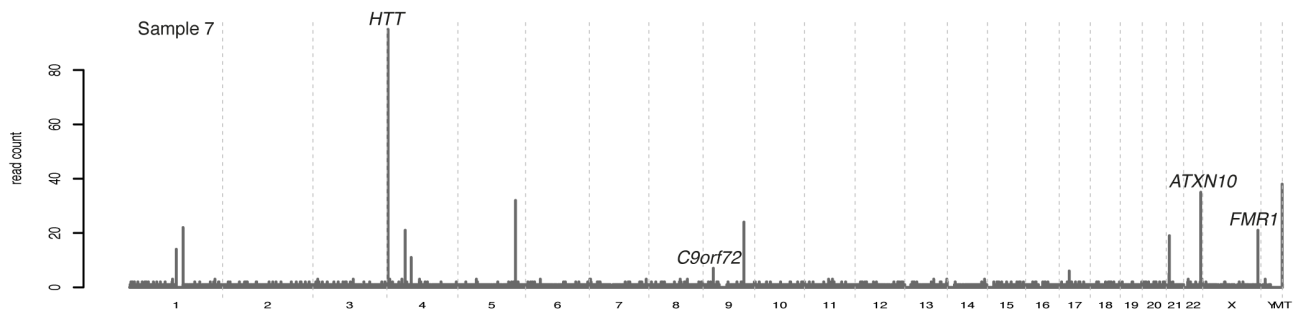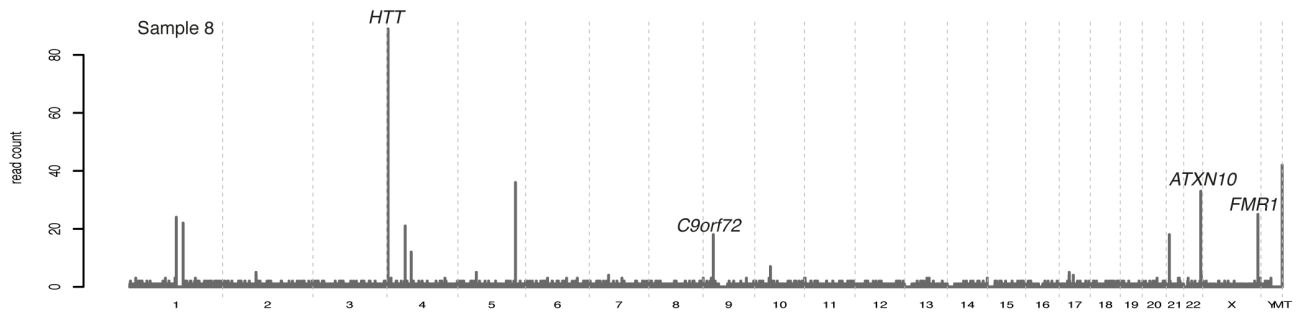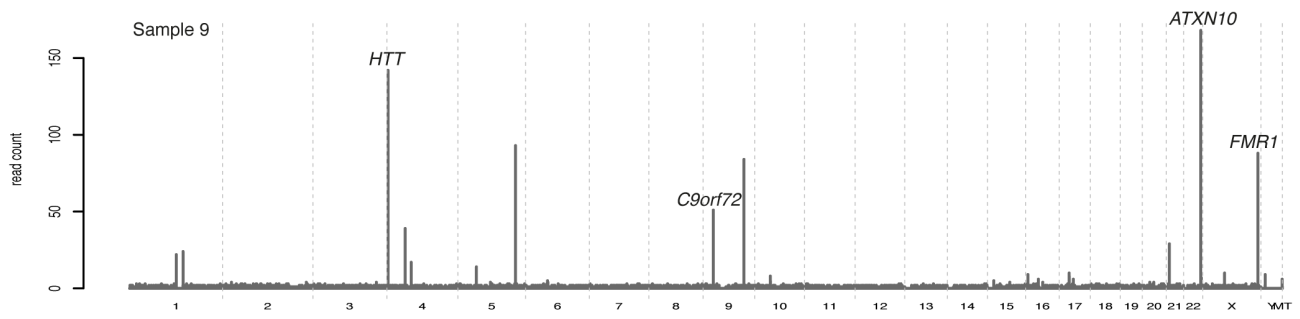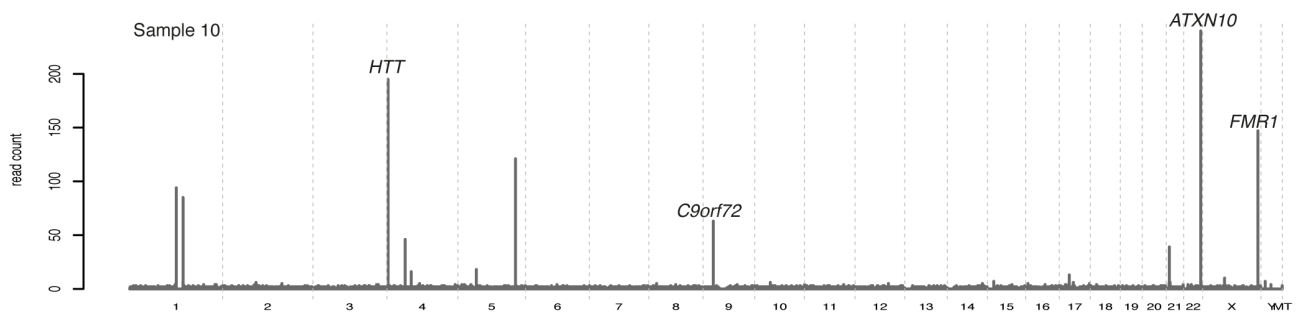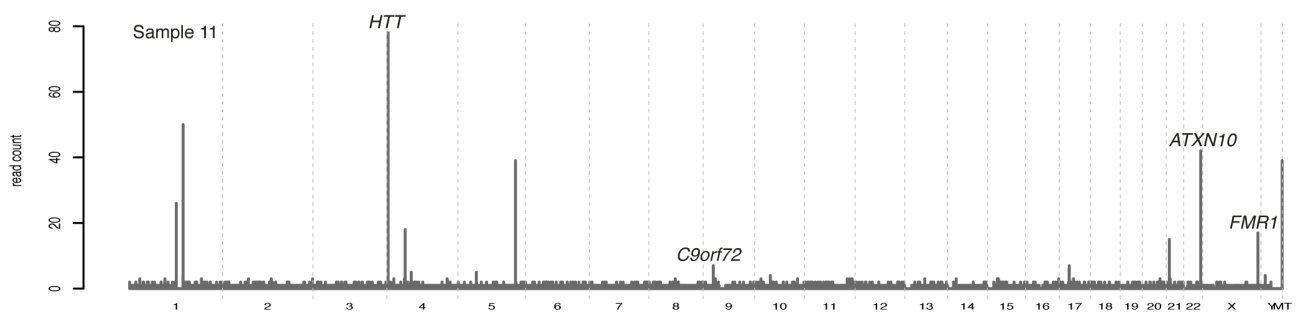

**Figure S5. Allelic distribution of CAG repeats and repeat-content plots for 11 HD samples.** The histograms in the left column show the allelic CAG distribution for all HD samples. The repeat-content plots in the right column show CAG repeats in red and CCG repeats in blue. Sequences that are neither CAG nor CCG are shown in grey.

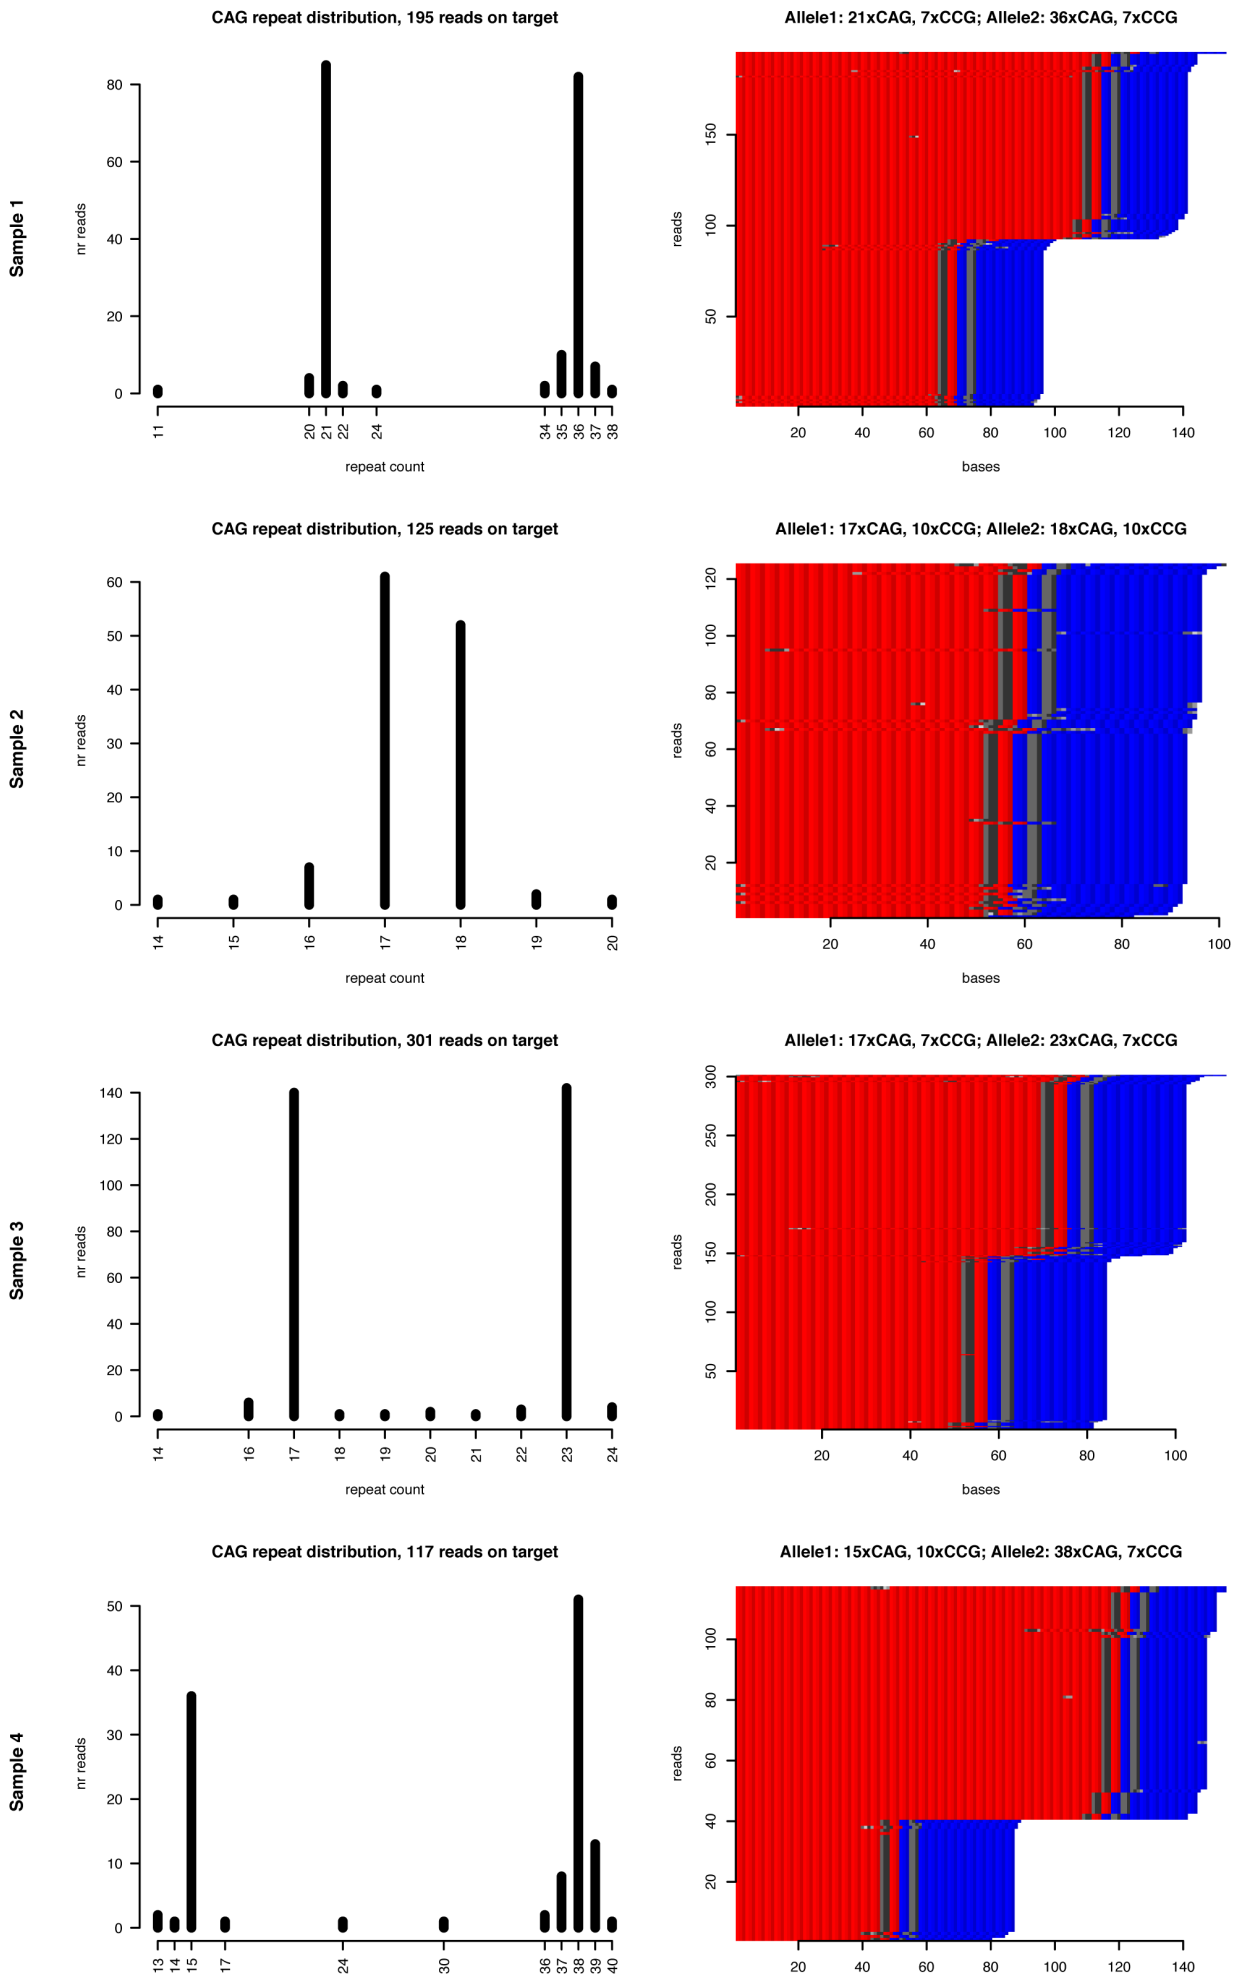

Sample 5

CAG repeat distribution, 261 reads on target

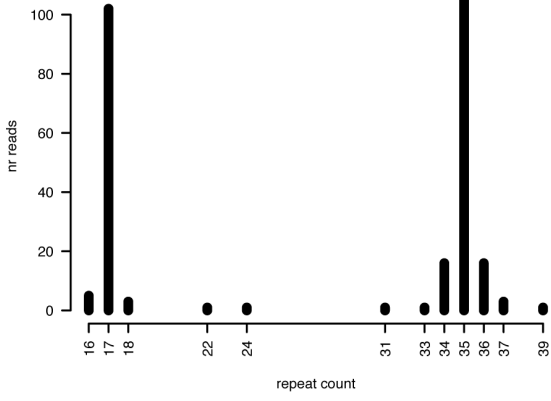

Allele1: 17xCAG, 10xCCG; Allele2: 35xCAG, 7xCCG

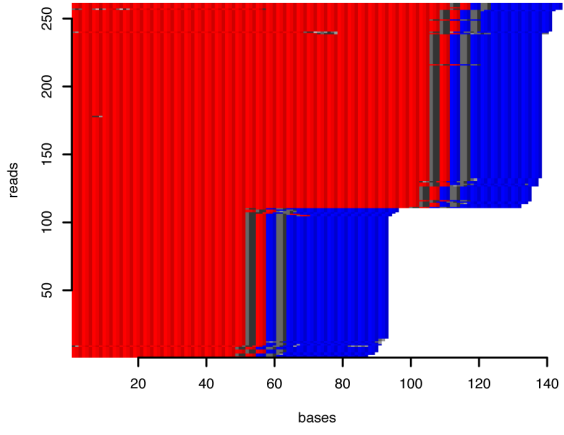

Sample 6

CAG repeat distribution, 160 reads on target

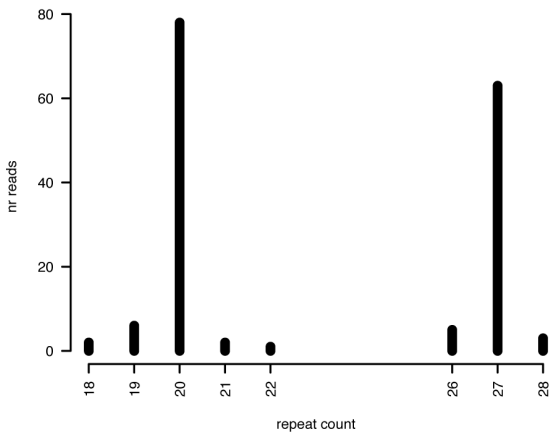

Allele1: 20xCAG, 7xCCG; Allele2: 27xCAG, 7xCCG

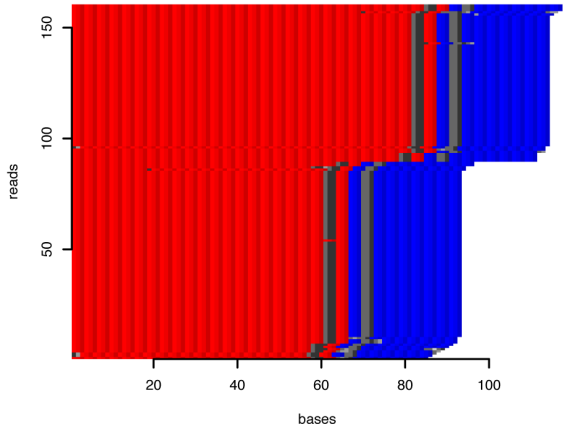

Sample 7

CAG repeat distribution, 88 reads on target

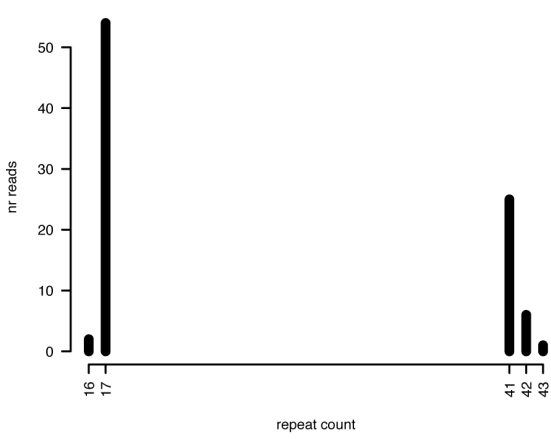

Allele1: 17xCAG, 10xCCG; Allele2: 41xCAG, 7xCCG

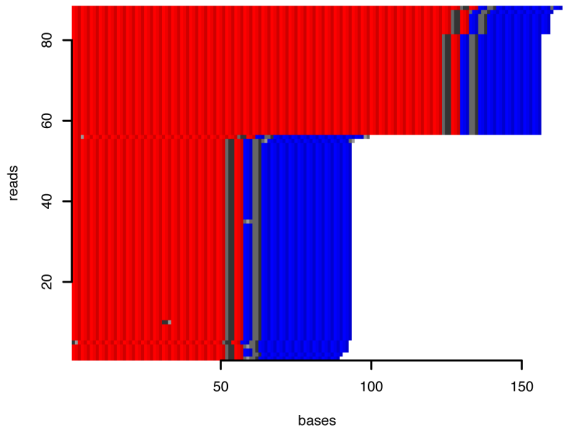

Sample 8

CAG repeat distribution, 84 reads on target

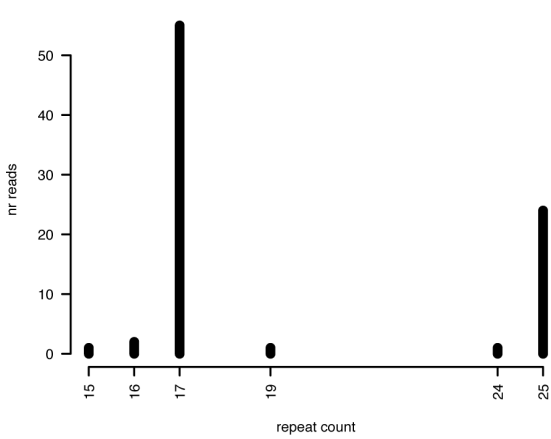

Allele1: 17xCAG, 10xCCG; Allele2: 25xCAG, 9xCCG

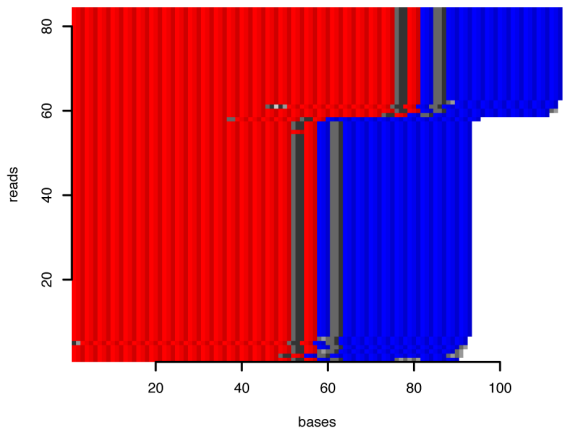



**Sample 9**

CAG repeat distribution, 132 reads on target

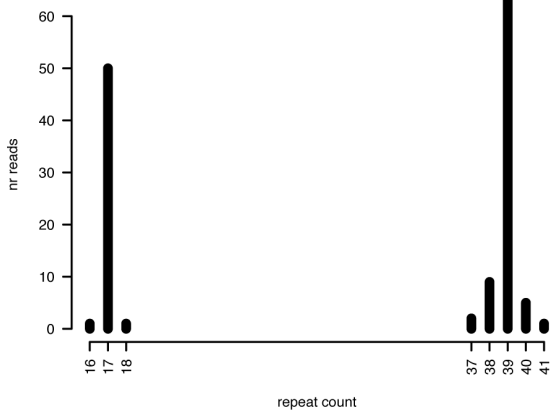

Allele1: 17xCAG, 7xCCG; Allele2: 39xCAG, 7xCCG

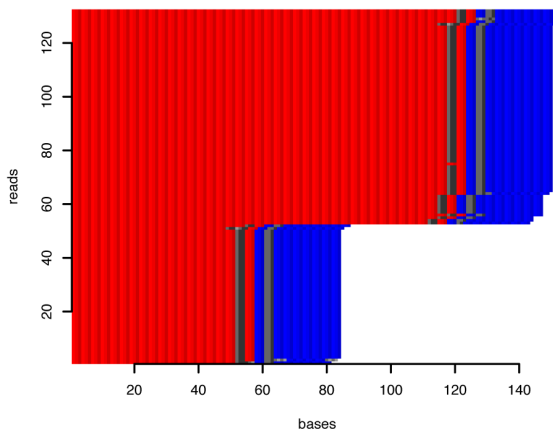

**Sample 10**

CAG repeat distribution, 186 reads on target

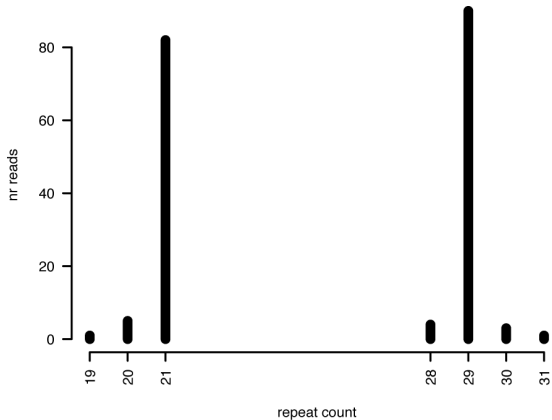

Allele1: 21xCAG, 7xCCG; Allele2: 29xCAG, 7xCCG

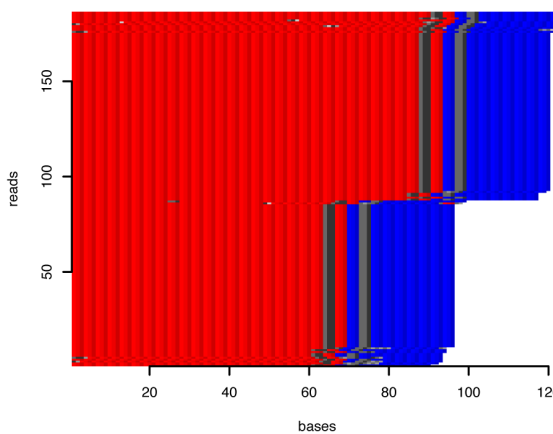

**Sample 11**

CAG repeat distribution, 75 reads on target

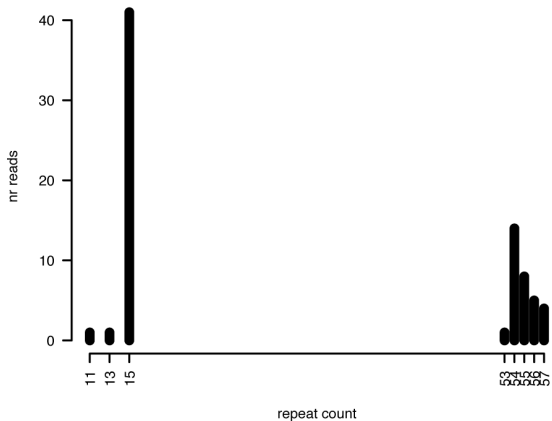

Allele1: 15xCAG, 10xCCG; Allele2: 54xCAG, 7xCCG

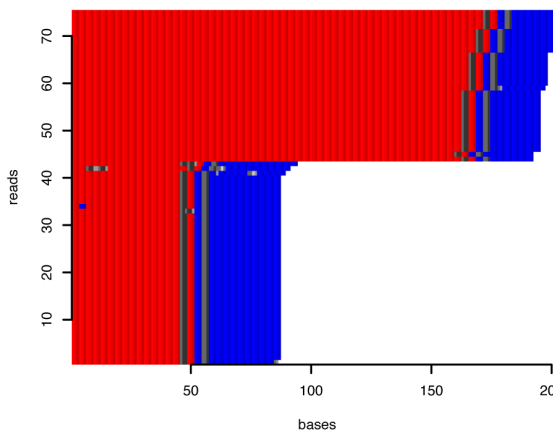

**Figure S6. Fragment analysis results for sample 11.** Fragment analysis result for sample 11 showing two alleles with 15 and 54 CAG repeats respectively.

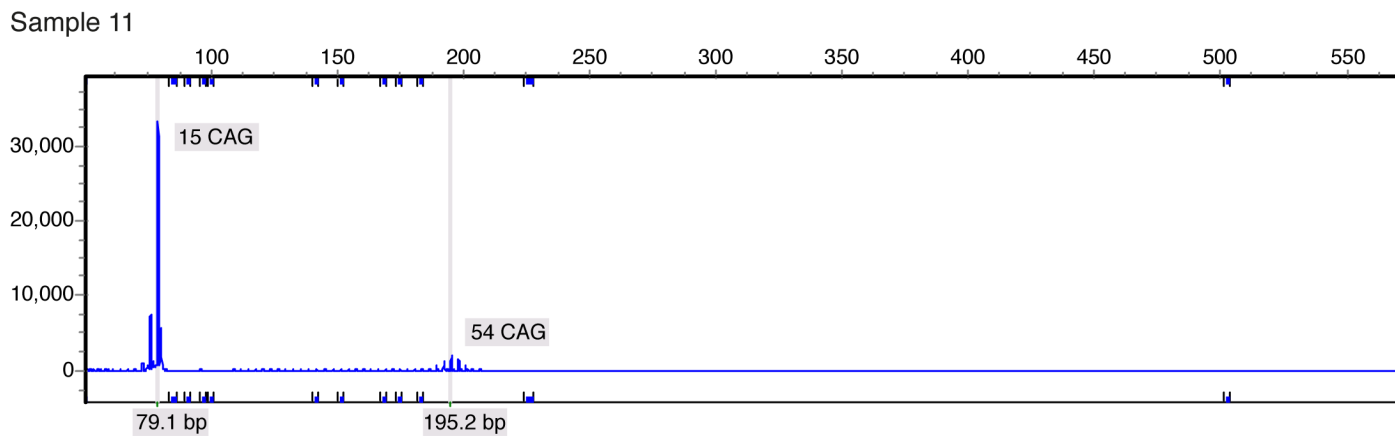

## Supporting Tables

Table S1. Sample library preparation information.

| Sample      | Input DNA ( $\mu$ g) | Amount into capture (ng) | Complexity reduction restriction enzymes | gRNAs                              |
|-------------|----------------------|--------------------------|------------------------------------------|------------------------------------|
| Replicate 1 | 20                   | 764                      | KpnI, EcoRV, MfeI, SpeI                  | <i>ATXN10, FMR1, HTT, C9orf72a</i> |
| Replicate 2 | 20                   | 743                      | KpnI, EcoRV, MfeI, SpeI                  | <i>ATXN10, FMR1, HTT, C9orf72a</i> |
| Replicate 3 | 20                   | 398                      | KpnI, EcoRV, MfeI, SpeI                  | <i>ATXN10, FMR1, HTT, C9orf72a</i> |
| Replicate 4 | 20                   | 588                      | KpnI, EcoRV, MfeI, SpeI                  | <i>ATXN10, FMR1, HTT, C9orf72a</i> |
| Replicate 5 | 20                   | 668                      | KpnI, EcoRV, MfeI, SpeI                  | <i>ATXN10, FMR1, HTT, C9orf72a</i> |
| Replicate 6 | 20                   | 651                      | KpnI, EcoRV, MfeI, SpeI                  | <i>ATXN10, FMR1, HTT, C9orf72a</i> |
| Sample 1    | 5.5                  | 570                      | KpnI, EcoRV                              | <i>ATXN10, FMR1, HTT, C9orf72b</i> |
| Sample 2    | 4.9                  | 468                      | KpnI, EcoRV                              | <i>ATXN10, FMR1, HTT, C9orf72b</i> |
| Sample 3    | 5.1                  | 378                      | KpnI, EcoRV                              | <i>ATXN10, FMR1, HTT, C9orf72b</i> |
| Sample 4    | 3.8                  | 258                      | KpnI, EcoRV                              | <i>ATXN10, FMR1, HTT, C9orf72b</i> |
| Sample 5    | 5.7                  | 792                      | KpnI, EcoRV                              | <i>ATXN10, FMR1, HTT, C9orf72b</i> |
| Sample 6    | 5.7                  | 588                      | KpnI, EcoRV                              | <i>ATXN10, FMR1, HTT, C9orf72b</i> |
| Sample 7    | 5.9                  | 714                      | KpnI, EcoRV                              | <i>ATXN10, FMR1, HTT, C9orf72b</i> |
| Sample 8    | 7.7                  | 762                      | KpnI, EcoRV                              | <i>ATXN10, FMR1, HTT, C9orf72b</i> |
| Sample 9    | 5.7                  | 582                      | KpnI, EcoRV                              | <i>ATXN10, FMR1, HTT, C9orf72b</i> |
| Sample 10   | 5.9                  | 666                      | KpnI, EcoRV                              | <i>ATXN10, FMR1, HTT, C9orf72b</i> |
| Sample 11   | 7.4                  | 786                      | KpnI, EcoRV                              | <i>ATXN10, FMR1, HTT, C9orf72b</i> |

**Table S2. Reads on-target and total CCS reads for HEK 293 replicates.**

| Sample      | CCS reads | Total CCS reads on-target | <i>C9orf72</i> (GGGGCC = 3)* |                                |                                | <i>ATXN10</i> (ATTCT = 14)* |                               |                               | <i>FMR1</i> (CGG = 19)* |                             |                             | <i>HTT</i> (CAG = 19)* |                             |                             |
|-------------|-----------|---------------------------|------------------------------|--------------------------------|--------------------------------|-----------------------------|-------------------------------|-------------------------------|-------------------------|-----------------------------|-----------------------------|------------------------|-----------------------------|-----------------------------|
|             |           |                           | CCS reads on-target          | (GGGGCC) <sub>n</sub> Allele 1 | (GGGGCC) <sub>n</sub> Allele 2 | CCS reads on-target         | (ATTCT) <sub>n</sub> Allele 1 | (ATTCT) <sub>n</sub> Allele 2 | CCS reads on-target     | (CGG) <sub>n</sub> Allele 1 | (CGG) <sub>n</sub> Allele 2 | CCS reads on-target    | (CAG) <sub>n</sub> Allele 1 | (CAG) <sub>n</sub> Allele 2 |
| Replicate 1 | 31218     | 1401                      | 59                           | 2                              | 4                              | 580                         | 16                            | 16                            | 480                     | 28                          | 29                          | 282                    | 17                          | 17                          |
| Replicate 2 | 27408     | 1906                      | 114                          | 2                              | 4                              | 1143                        | 16                            | 16                            | 400                     | 28                          | 29                          | 249                    | 17                          | 17                          |
| Replicate 3 | 11194     | 324                       | 26                           | 2                              | 4                              | 147                         | 16                            | 16                            | 90                      | 28                          | 29                          | 61                     | 17                          | 17                          |
| Replicate 4 | 38879     | 1863                      | 98                           | 2                              | 4                              | 1079                        | 16                            | 16                            | 426                     | 28                          | 29                          | 260                    | 17                          | 17                          |
| Replicate 5 | 39863     | 1559                      | 80                           | 2                              | 4                              | 851                         | 16                            | 16                            | 426                     | 28                          | 29                          | 202                    | 17                          | 17                          |
| Replicate 6 | 29731     | 1386                      | 76                           | 2                              | 4                              | 727                         | 16                            | 16                            | 383                     | 28                          | 29                          | 200                    | 17                          | 17                          |

\* Number of repeats in human reference genome GRCh38

**Table S3. Reads on-target and total CCS reads for 11 patient samples.**

| Sample    | CCS reads | Total CCS reads on-target | <i>C9orf72</i> (GGGGCC = 3)* |                                |                                | <i>ATXN10</i> (ATTCT = 14)* |                               |                               | <i>FMR1</i> (CGG = 19)* |                             |                             | <i>HTT</i> (CAG = 19)* |                             |                             |
|-----------|-----------|---------------------------|------------------------------|--------------------------------|--------------------------------|-----------------------------|-------------------------------|-------------------------------|-------------------------|-----------------------------|-----------------------------|------------------------|-----------------------------|-----------------------------|
|           |           |                           | CCS reads on-target          | (GGGGCC) <sub>n</sub> Allele 1 | (GGGGCC) <sub>n</sub> Allele 2 | CCS reads on-target         | (ATTCT) <sub>n</sub> Allele 1 | (ATTCT) <sub>n</sub> Allele 2 | CCS reads on-target     | (CGG) <sub>n</sub> Allele 1 | (CGG) <sub>n</sub> Allele 2 | CCS reads on-target    | (CAG) <sub>n</sub> Allele 1 | (CAG) <sub>n</sub> Allele 2 |
| Sample 1  | 5902      | 595                       | 85                           | 2                              | 2                              | 214                         | 14                            | 15                            | 101                     | 28                          | 30                          | 195                    | 21                          | 36                          |
| Sample 2  | 7317      | 644                       | 114                          | 2                              | 2                              | 295                         | 13                            | 14                            | 110                     | 27                          | 28                          | 125                    | 17                          | 18                          |
| Sample 3  | 9892      | 868                       | 96                           | 2                              | 2                              | 337                         | 12                            | 15                            | 134                     | 28                          | 29                          | 301                    | 17                          | 23                          |
| Sample 4  | 5775      | 333                       | 43                           | 7                              | 15                             | 155                         | 14                            | 17                            | 18                      | 34                          | 35                          | 117                    | 15                          | 38                          |
| Sample 5  | 33415     | 827                       | 109                          | 2                              | 2                              | 396                         | 13                            | 14                            | 61                      | 28                          | 28                          | 261                    | 17                          | 35                          |
| Sample 6  | 11590     | 452                       | 60                           | 2                              | 8                              | 164                         | 14                            | 17                            | 68                      | 22                          | 28                          | 160                    | 20                          | 27                          |
| Sample 7  | 4862      | 131                       | 7                            | 2                              | 5                              | 27                          | 14                            | 14                            | 9                       | 23                          | 27                          | 88                     | 17                          | 41                          |
| Sample 8  | 6025      | 137                       | 16                           | 2                              | 2                              | 25                          | 14                            | 14                            | 12                      | 35                          | 37                          | 84                     | 17                          | 25                          |
| Sample 9  | 10624     | 378                       | 49                           | 2                              | 2                              | 143                         | 13                            | 14                            | 54                      | 28                          | 29                          | 132                    | 17                          | 39                          |
| Sample 10 | 13500     | 548                       | 60                           | 2                              | 2                              | 202                         | 14                            | 16                            | 100                     | 28                          | 35                          | 186                    | 21                          | 29                          |
| Sample 11 | 5852      | 120                       | 6                            | 2                              | 4                              | 28                          | 13                            | 14                            | 11                      | 29                          | 29                          | 75                     | 15                          | 54                          |

\* Number of repeats in human reference genome GRCh38
